# Supplementary material
Source: Frontiers journal article supplement (https://www.frontiersin.org/articles/346798)
Supplement: Image_5.PDF [file Image_5.PDF]

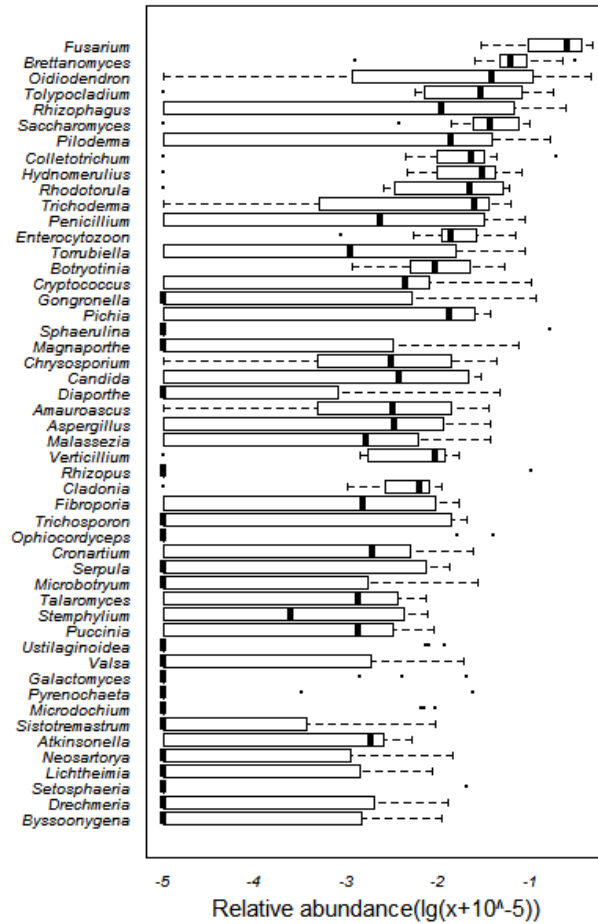

Figure S5 Abundance of the 50 most abundant fungal genera
